# Supplementary material
Source: PubMed Central journal article supplement (PMC8824540)
Supplement: web_material_kwab237.pdf [file web_material_kwab237.pdf]

## Web Material

### Explaining Ethnic Differentials in Coronavirus Disease 2019 Mortality: A Cohort Study

G. David Batty (david.batty@ucl.ac.uk)

Department of Epidemiology and Public Health, University College London, UK

Bamba Gaye (bamba.gaye@innserm.fr)

Paris Cardiovascular Research Center-INSERM U970, France

Catharine R. Gale (crg@mrc.soton.ac.uk)

MRC Lifecourse Epidemiology Unit, University of Southampton, UK

Lothian Birth Cohorts, Department of Psychology, University of Edinburgh, UK

Mark Hamer (m.hamer@ucl.ac.uk)

Division of Surgery and Interventional Sciences, University College London, London

and

Camille Lassale (classale@imim.es)

Hospital del Mar Medical Research Institute, Barcelona, Spain

CIBER of Pathophysiology of Obesity and Nutrition, Madrid, Spain

*Web Table 1. Baseline characteristics of the analytical sample according to ethnic group (2006-10)*

*Web Table 2. Odds ratios (95% confidence intervals) for the association of ethnicity (2006-10) with COVID-19 mortality (2020-21) – sub-sample with biomarker data (N=358,820; 578 deaths)*

*Web Table 3. Odds ratios (95% confidence intervals) for the association of ethnicity (2006-10) with COVID-19 mortality (2020-21) in a sub-sample with occupational data (N=322,353; 328 deaths)*

*Web Table 4. Odds ratios (95% confidence intervals) for the association of ethnicity (2006-10) with COVID-19 (2020-21) – based on 2 imputed datasets (N= 470,665; 781 deaths)*

*Web Table 5. Comparison of the self-declared ethnic groups in UK Biobank (2006–2010) with UK censuses in 2001 and 2011 – all comparisons are for people aged 40–69 years at assessment*

*Web Table 6. Age- and sex-adjusted hazard ratios (95% confidence intervals) for the relation of ethnicity with mortality outcomes in UK Biobank*

**Web Table 1. Baseline characteristics of the analytical sample according to ethnic group (2006-10)**

|                                                  | <b>Black</b> | <b>South Asian</b> | <b>Other</b> | <b>White</b>  |
|--------------------------------------------------|--------------|--------------------|--------------|---------------|
| Number                                           | 6,816        | 7,839              | 7,744        | 426,265       |
| Women, N (%)                                     | 4012 (58.9)  | 3741 (47.7)        | 4695 (60.6)  | 236372 (55.5) |
| Age, years, mean (SD)                            | 51.7 (7.9)   | 53.1 (8.4)         | 52.1 (7.8)   | 56.4 (8.0)    |
| Higher education, N (%)                          | 2371 (34.8)  | 3382 (43.1)        | 3627 (46.8)  | 141140 (33.1) |
| Household $\geq$ 4 people, N (%)                 | 2195 (32.2)  | 3991 (50.9)        | 2455 (31.7)  | 78889 (18.5)  |
| High neighbourhood deprivation, N (%)            | 4370 (64.1)  | 2873 (36.7)        | 3371 (43.5)  | 78997 (18.5)  |
| Manual occupation, N (%)                         | 1597 (31.2)  | 1527 (26.7)        | 1280 (22.8)  | 54710 (17.9)  |
| Alcohol intake daily, N (%)                      | 451 (6.6)    | 546 (7)            | 777 (10)     | 89829 (21.1)  |
| Current smoking, N (%)                           | 795 (11.7)   | 704 (9.0)          | 1047 (13.5)  | 41163 (9.7)   |
| Hypertension, N (%)                              | 4200 (61.6)  | 4327 (55.2)        | 3769 (48.7)  | 246517 (57.8) |
| Diabetes, N (%)                                  | 700 (10.3)   | 1239 (15.8)        | 588 (7.6)    | 18342 (4.3)   |
| Cardiovascular disease, N (%)                    | 280 (4.1)    | 577 (7.4)          | 284 (3.7)    | 21422 (5)     |
| Chronic bronchitis, N (%)                        | 38 (0.6)     | 70 (0.9)           | 64 (0.8)     | 5622 (1.3)    |
| Seen a psychiatrist, N (%)                       | 565 (8.3)    | 760 (9.7)          | 967 (12.5)   | 48070 (11.3)  |
| BMI, kg/m, <sup>2</sup> mean (SD)                | 29.6 (5.4)   | 27.1 (4.4)         | 26.0 (5.0)   | 27.3 (4.7)    |
| Waist to hip ratio, mean (SD)                    | 0.87 (0.08)  | 0.90 (0.08)        | 0.86 (0.08)  | 0.87 (0.09)   |
| White blood cells, 10 <sup>9</sup> /L, mean (SD) | 5.78 (1.66)  | 7.30 (1.75)        | 6.76 (1.93)  | 6.85 (1.96)   |
| HbA1c, mmol/mol, mean (SD)                       | 39.2 (9.9)   | 40.1 (9.8)         | 37.3 (8.0)   | 35.8 (6.2)    |
| HDL-cholesterol, mmol/L, mean (SD)               | 1.44 (0.36)  | 1.27 (0.33)        | 1.42 (0.38)  | 1.46 (0.38)   |

**Web Table 2. Odds ratios (95% confidence intervals) for the association of ethnicity (2006-10) with COVID-19 mortality (2020-21) – sub-sample with biomarker data (N=358,820; 578 deaths)**

| <b>Ethnicity</b><br>(no. deaths/no people) | <b>Adjustment</b>     | <b>Odds ratio</b> | <b>95% confidence interval</b> | <b>P-value</b> | <b>Attenuation (%)</b> |
|--------------------------------------------|-----------------------|-------------------|--------------------------------|----------------|------------------------|
| Black (19/4,445)                           | Age- and sex-adjusted | 4.87              | 3.07, 7.73                     | <0.001         |                        |
|                                            | + Social factors      | 3.07              | 1.91, 4.91                     | <0.001         | -29.2                  |
|                                            | + Lifestyle factors   | 3.69              | 2.31, 5.90                     | <0.001         | -17.5                  |
|                                            | + Comorbidities       | 4.27              | 2.68, 6.80                     | <0.001         | -8.3                   |
|                                            | + Biomarkers          | 4.69              | 2.93, 7.53                     | <0.001         | -2.3                   |
|                                            | Multiply-adjusted     | 3.10              | 1.91, 5.05                     | <0.001         | -28.5                  |
| South Asian (14/6,005)                     | Age- and sex-adjusted | 1.92              | 1.13, 3.28                     | 0.08           |                        |
|                                            | + Social factors      | 1.82              | 1.06, 3.14                     | 0.17           | -8.0                   |
|                                            | + Lifestyle factors   | 1.52              | 0.88, 2.62                     | 0.26           | -36.4                  |
|                                            | + Comorbidities       | 1.48              | 0.86, 2.53                     | 0.20           | -40.3                  |
|                                            | + Biomarkers          | 1.35              | 0.79, 2.32                     | 0.32           | -53.6                  |
|                                            | Multiply-adjusted     | 1.36              | 0.78, 2.39                     | 0.53           | -52.8                  |
| Other (7/5,943)                            | Age- and sex-adjusted | 1.29              | 0.61, 2.73                     | 0.43           |                        |
|                                            | + Social factors      | 1.10              | 0.52, 2.33                     | 0.67           | -62.8                  |
|                                            | + Lifestyle factors   | 1.06              | 0.50, 2.25                     | 0.64           | -76.9                  |
|                                            | + Comorbidities       | 1.17              | 0.55, 2.47                     | 0.51           | -39.4                  |
|                                            | + Biomarkers          | 1.14              | 0.54, 2.41                     | 0.55           | -49.2                  |
|                                            | Multiply-adjusted     | 0.98              | 0.46, 2.08                     | 0.83           | -107.9                 |

The reference category is White ethnicity (538 deaths in 342,427 people). Socioeconomic status: education, area deprivation index, household size; Lifestyle factors: alcohol consumption, cigarette smoking, body mass index, waist to hip ratio; Comorbidities: hypertension, diabetes, cardiovascular disease, chronic bronchitis, consultation with a psychiatrist; Biomarkers: HDL-cholesterol, white blood cell count, glycated haemoglobin.

**Web Table 3. Odds ratios (95% confidence intervals) for the association of ethnicity (2006-10) with COVID-19 mortality (2020-21) in a sub-sample with occupational data (N=322,353; 328 deaths)**

| <b>Ethnicity</b><br>(no. deaths/no people) | <b>Adjustment</b>                | <b>Odds ratio</b> | <b>95% confidence interval</b> | <b>P-value</b> | <b>Attenuation (%)</b> |
|--------------------------------------------|----------------------------------|-------------------|--------------------------------|----------------|------------------------|
| Black (20/5,099)                           | Age- and sex-adjusted            | 6.46              | 4.09, 10.20                    | <0.001         |                        |
|                                            | + Social factors plus occupation | 3.96              | 2.46, 6.36                     | <0.001         | -26.3                  |
|                                            | + Lifestyle factors              | 4.53              | 2.83, 7.25                     | <0.001         | -19.0                  |
|                                            | + Comorbidities                  | 5.57              | 3.51, 8.85                     | <0.001         | -7.9                   |
|                                            | Multiply-adjusted                | 3.30              | 2.02, 5.37                     | <0.001         | -36.1                  |
| South Asian (8/5,709)                      | Age- and sex-adjusted            | 1.68              | 0.83, 3.40                     | 0.15           |                        |
|                                            | + Social factors plus occupation | 1.51              | 0.74, 3.08                     | 0.26           | -21.2                  |
|                                            | + Lifestyle factors              | 1.18              | 0.57, 2.42                     | 0.66           | -68.6                  |
|                                            | + Comorbidities                  | 1.34              | 0.66, 2.72                     | 0.42           | -44.1                  |
|                                            | Multiply-adjusted                | 1.09              | 0.52, 2.28                     | 0.82           | -83.6                  |
| Other (4/5,620)                            | Age- and sex-adjusted            | 1.15              | 0.43, 3.09                     | 0.78           |                        |
|                                            | + Social factors plus occupation | 0.95              | 0.35, 2.55                     | 0.91           | -139.0                 |
|                                            | + Lifestyle factors              | 0.90              | 0.33, 2.44                     | 0.84           | -173.8                 |
|                                            | + Comorbidities                  | 1.04              | 0.39, 2.81                     | 0.93           | -69.2                  |
|                                            | Multiply-adjusted                | 0.82              | 0.30, 2.22                     | 0.70           | -242.0                 |

The reference category is White ethnicity (296 deaths in 305,925 people). Socioeconomic status: education, area deprivation index, household size, occupation; Lifestyle factors: alcohol consumption, cigarette smoking, body mass index, waist to hip ratio; Comorbidities: hypertension, diabetes, cardiovascular disease, chronic bronchitis, consultation with a psychiatrist.

**Web Table 4. Odds ratios (95% confidence intervals) for the association of ethnicity (2006-10) with COVID-19 (2020-21) – based on 2 imputed datasets (N= 470,665; 781 deaths)**

| <b>Ethnicity</b><br>(no. deaths/no people) | <b>Adjustment</b>                    | <b>Odds ratio</b> | <b>95% confidence interval</b> | <b>P-value</b> | <b>Attenuation (%)</b> |
|--------------------------------------------|--------------------------------------|-------------------|--------------------------------|----------------|------------------------|
| Black (29/7,779)                           | Age- and sex-adjusted                | 3.99              | 2.74, 5.80                     | <0.001         |                        |
|                                            | + Social factors                     | 2.66              | 1.81, 3.90                     | <0.001         | -29.3                  |
|                                            | + Social factors plus occupation     | 2.52              | 1.71, 3.69                     | <0.001         | -33.3                  |
|                                            | + Lifestyle factors                  | 3.06              | 2.09, 4.47                     | <0.001         | -19.3                  |
|                                            | + Comorbidities                      | 3.39              | 2.32, 4.95                     | <0.001         | -11.8                  |
|                                            | + Biomarkers                         | 3.84              | 2.62, 5.62                     | <0.001         | -2.8                   |
|                                            | Multiply-adjusted without biomarkers | 2.35              | 1.59, 3.47                     | <0.001         | -38.3                  |
| Multiply-adjusted                          | 2.58                                 | 1.74, 3.84        | <0.001                         | -31.4          |                        |
| South Asian (22/9,489)                     | Age- and sex-adjusted                | 1.87              | 1.22, 2.87                     | 0.004          |                        |
|                                            | + Social factors                     | 1.81              | 1.17, 2.80                     | 0.01           | -5.7                   |
|                                            | + Social factors plus occupation     | 1.74              | 1.12, 2.70                     | 0.01           | -12.0                  |
|                                            | + Lifestyle factors                  | 1.53              | 0.99, 2.38                     | 0.06           | -32.0                  |
|                                            | + Comorbidities                      | 1.40              | 0.91, 2.16                     | 0.12           | -46.1                  |
|                                            | + Biomarkers                         | 1.33              | 0.86, 2.04                     | 0.20           | -55.0                  |
|                                            | Multiply-adjusted without biomarkers | 1.44              | 0.91, 2.27                     | 0.12           | -42.2                  |
| Multiply-adjusted                          | 1.40                                 | 0.88, 2.20        | 0.15                           | -46.9          |                        |
| Other (10/8,756)                           | Age- and sex-adjusted                | 1.23              | 0.66, 2.30                     | 0.52           |                        |
|                                            | + Social factors                     | 1.06              | 0.56, 1.98                     | 0.86           | -72.7                  |
|                                            | + Social factors plus occupation     | 1.03              | 0.55, 1.93                     | 0.93           | -86.8                  |
|                                            | + Lifestyle factors                  | 1.02              | 0.54, 1.91                     | 0.95           | -90.1                  |
|                                            | + Comorbidities                      | 1.09              | 0.58, 2.05                     | 0.78           | -56.7                  |
|                                            | + Biomarkers                         | 1.08              | 0.58, 2.03                     | 0.80           | -60.7                  |
|                                            | Multiply-adjusted without biomarkers | 0.95              | 0.51, 1.79                     | 0.88           | -124.2                 |
| Multiply-adjusted                          | 0.96                                 | 0.51, 1.81        | 0.91                           | -118.5         |                        |

The reference category is White ethnicity (720 deaths in 444,641). Socioeconomic status: education, area deprivation index, household size; Lifestyle factors: alcohol consumption, cigarette smoking, body mass index, waist to hip ratio; Comorbidities: hypertension, diabetes, cardiovascular disease, chronic bronchitis, consultation with a psychiatrist; Biomarkers: HDL-cholesterol, white blood cell count, glycated haemoglobin

**Web Table 5. Comparison of the self-declared ethnic groups in UK Biobank (2006–2010) with UK censuses in 2001 and 2011 – all comparisons are for people aged 40–69 years at assessment**

| <b>Ethnicity groups in present analyses</b> | <b>UK Biobank<br/>(n = 499,877)</b> | <b>2001 UK Census<sup>23</sup><br/>(n = 20,198,307)</b> | <b>2011 UK Census<sup>24</sup><br/>(n = 23,146,612)</b> |
|---------------------------------------------|-------------------------------------|---------------------------------------------------------|---------------------------------------------------------|
| White                                       | 94.6 (472,837)                      | 94.5 (19,085,322)                                       | 91.3 (21,133,317)                                       |
| Black/Black British                         | 1.6 (8,066)                         | 1.5 (302,073)                                           | 2.4 (565,777)                                           |
| South Asian                                 | 1.6 (8,024)                         | 2.5 (519,566)                                           | 3.2 (757,423)                                           |
| Other                                       | 2.2 (10,950)                        | 1.5 (291,346)                                           | 3.1 (690,095)                                           |

Results are % (N)

**Web Table 6. Age- and sex-adjusted hazard ratios (95% confidence intervals) for the relation of ethnicity with mortality outcomes in UK Biobank**

|                    |                        | <b>White</b> | <b>Other</b>      | <b>South Asian</b> | <b>Black</b>      |
|--------------------|------------------------|--------------|-------------------|--------------------|-------------------|
| <b>COVID-19*</b>   | N cases / N risk       | 650/426265   | 8/7744            | 19/7839            | 28/6816           |
|                    | Odds ratios (95% CI)   | 1.0 (ref)    | 1.19 (0.59, 2.40) | 2.05 (1.30, 3.25)  | 4.81 (3.28, 7.05) |
| <b>All deaths</b>  | N cases / N risk       | 32483/472729 | 374/9091          | 469/9882           | 342/8061          |
|                    | Hazard ratios (95% CI) | 1.0          | 0.90 (0.81, 1.00) | 0.86 (0.78, 0.94)  | 0.93 (0.84, 1.04) |
| <b>CHD</b>         | N cases / N risk       | 5293/472729  | 56/9091           | 169/9882           | 42/8061           |
|                    | Hazard ratios (95% CI) | 1.0          | 0.91 (0.61, 1.19) | 1.82 (1.57, 2.13)  | 0.77 (0.57, 1.05) |
| <b>Stroke</b>      | N cases / N risk       | 1973/472729  | 23/9091           | 33/9882            | 28/8061           |
|                    | Hazard ratios (95% CI) | 1.0          | 1.01 (0.69, 1.52) | 1.07 (0.76, 1.51)  | 1.38 (0.95, 2.01) |
| <b>All cancers</b> | N cases / N risk       | 16609/472729 | 206/9091          | 174/9882           | 159/8061          |
|                    | Hazard ratios (95% CI) | 1.0          | 0.88 (0.76, 1.01) | 0.59 (0.50, 0.68)  | 0.77 (0.66, 0.91) |

\*Results from present manuscript. Deaths from COVID-19 are from 5<sup>th</sup> March 2020, to 24<sup>th</sup> January, 2021; deaths from other causes are from 10<sup>th</sup> May 2006 to 18<sup>th</sup> December 2020.
